# Supplementary material for: A facile coordination precipitation route to prepare porous CuO microspheres with excellent photo-Fenton catalytic activity and electrochemical performance
Source: Royal Society of Chemistry journal article supplement (doi:10.1039/c8ce01953c), 2018-12-11
Supplement: c8ce01953c1.pdf [file c8ce01953c1.pdf]

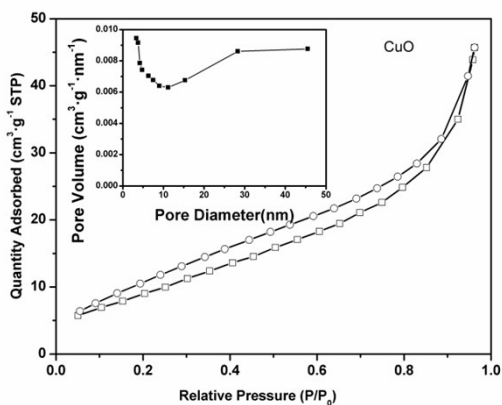

Fig. S1 N<sub>2</sub> adsorption–desorption isotherm of the CuO porous microspheres. The inset is corresponding pore size distribution plot.

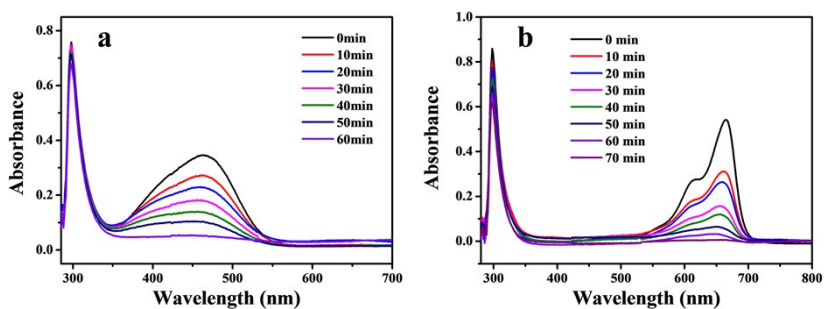

Fig. S2 UV-visible absorption spectra of reduction of MO (a) and MB (b) for various time intervals using the porous CuO microspheres in the presence of H<sub>2</sub>O<sub>2</sub>.

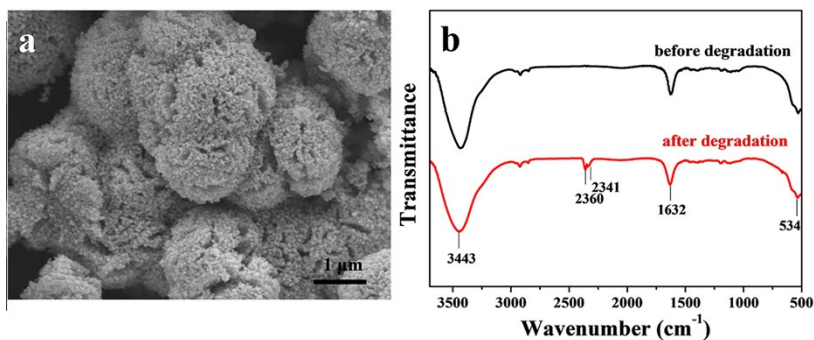

Fig. S3 SEM picture of the CuO after the six cycles (a) and FTIR spectra of the CuO before and after the RhB degradation.
